# Supplementary material for: Y-chromosome microdeletions in nonobstructive azoospermia and severe oligozoospermia
Source: PubMed Central journal article supplement — Asian J Androl. 2016 Feb 23;19(3):338–45. doi: 10.4103/1008-682X.172827 (PMC5427791; doi:10.4103/1008-682x.172827), 2016-02-23
Supplement: AJA-19-338_Suppl1.pdf [file AJA-19-338_Suppl1.pdf]

**Supplementary Table 1a: Embryological and clinical outcomes of patients with Y-chromosome microdeletions (TESE)**

| TESE                                        | AZFa                | AZFb               | AZFc                  | P <sup>a</sup>                |
|---------------------------------------------|---------------------|--------------------|-----------------------|-------------------------------|
| Patients (n)                                | 4 + (1)             | 3                  | 29 + (8)              | 36 + (9)                      |
| Cycles (n)                                  | 5                   | 3                  | 43                    | 51                            |
| COC (n, mean, range)                        | 26 (5.2±3.4) (3–12) | 19 (6.3±2.5) (3–9) | 430 (10±5.4) (0–25)   | NS: a=0.728; b=0.308; c=0.263 |
| MII (n, mean, range)                        | 24 (4.8±3.7) (2–12) | 17 (5.7±2.6) (2–8) | 351 (8.4±4.6) (0–22)  | NS: a=0.758; b=0.418; c=0.341 |
| Maturation rate (MII/COC)                   | 92.3                | 89.5               | 81.6                  | NS: a=0.744; b=0.166; c=0.381 |
| 2PN (n, mean, range)                        | 16 (3.2±2.6) (0–8)  | 8 (2.7±0.9) (2–4)  | 186 (4.5±2.5) (1–10)  | NS: a=0.733; b=0.393; c=0.456 |
| FR (2PN/MI)                                 | 66.7                | 47.1               | 52.9                  | NS: a=0.209; b=0.189; c=0.640 |
| Embryos cleaved (n, mean, range)            | 15 (3.8±2.5) (2–8)  | 7 (2.3±1.2) (1–4)  | 178 (4.3±2.4) (1–10)  | NS: a=0.358; b=0.700; c=0.394 |
| ECR (d2/2PN)                                | 93.8                | 87.5               | 95.7                  | NS: a=0.598; b=0.724; c=0.280 |
| Day 3 embryos (n, mean, range)              | 15 (3.8±2.5) (2–8)  | 7 (2.3±1.2) (1–4)  | 165 (4.02±2.6) (0–10) | NS: a=0.406; b=0.872; c=0.579 |
| Day 3 grade A/B embryos (n, rate, range)    | 7 (46.7) (1–3)      | 5 (71.4) (1–2)     | 111 (67.3) (0–9)      | NS: a=0.953; b=0.344; c=0.570 |
| Embryos at day 5 (n, mean, range)           | 8 (2±3.4) (0–8)     | -                  | 62 (1.9±3.1) (0–10)   | NS: a=0.582; b=0.975; c=0.339 |
| BL (n, range)                               | 1 (1–1)             | -                  | 17 (0–5)              | NS: 0.629                     |
| BLR (BL/d5)                                 | 12.5                | -                  | 27.4                  | NS: 0.364                     |
| ETC (n, range, rate)                        | 4 (3–5) (80.0)      | 3 (3–3) (100)      | 40 (2–5) (93.02)      | NS: a=0.408; b=0.319; c=0.636 |
| n° ET (n, mean, range)                      | 10 (2.5±0.5) (2–3)  | 7 (2.3±0.5) (2–3)  | 91 (2.2±0.75) (0–3)   | NS: a=0.725; b=0.824; c=0.810 |
| BP (/ETC) (n, rate)                         | -                   | 1 (33.3)           | 15 (37.5)             | NS: 0.885                     |
| CP (/ETC) (n, rate)                         | -                   | 1 (33.3)           | 15 (37.5)             | NS: 0.885                     |
| Sacs (n, range)                             | -                   | 1 (1–1)            | 18 (1–2)              | -                             |
| IR (n° sacs/n° ET)                          | -                   | 14.3               | 19.8                  | NS: 0.723                     |
| Sg (/CP) (n, rate)                          | -                   | 1 (100)            | 13 (86.7)             | -                             |
| Tw (/CP) (n, rate)                          | -                   | -                  | 2 (13.3)              | -                             |
| Triplets (/CP) (n, rate)                    | -                   | -                  | -                     | -                             |
| Ect P (/CP) (n, rate, range)                | -                   | -                  | -                     | -                             |
| Abortion (/CP) (n, rate)                    | -                   | 1 (100)            | 5 (33.3)              | -                             |
| OP (/ETC) (n, rate) (CP-abortion)           | -                   | -                  | 10 (25.0)             | NS: 0.323                     |
| Delivery (/ETC) (n, rate)                   | -                   | -                  | 10 (25.0)             | NS: 0.323                     |
| Stillbirth (/ETC) (n, rate)                 | -                   | -                  | -                     | -                             |
| LBDR (/ETC) (n, rate) (delivery-stillbirth) | -                   | -                  | 10 (25.0)             | NS: 0.323                     |
| NB (/ETC) (n, rate)                         | -                   | -                  | 12 (30.0)             | NS: 0.264                     |
| NB (Sg; Tw)                                 | -                   | -                  | 8 (Sg); 2 (Tw)        | -                             |
| Male (/NB) (n, rate)                        | -                   | -                  | 4 (33.3)              | -                             |
| Female (/NB) (n, rate)                      | -                   | -                  | 8 (66.6)              | -                             |
| Male/female ratio                           | -                   | -                  | 0.5                   | -                             |
| NB malform (n, rate)                        | -                   | -                  | 1 (8.3)               | -                             |
| Major (/NB) (n, rate)                       | -                   | -                  | 1 (8.3)               | -                             |
| Minor (/NB) (n, rate)                       | -                   | -                  | -                     | -                             |
| NB Chr abn (n, rate, range)                 | -                   | -                  | -                     | -                             |
| ENdeath (/ETC) (n, rate, range)             | -                   | -                  | -                     | -                             |

TESE: results from ICSI with fresh testicular sperm. Comparisons – a: AZFa versus AZFb; b: AZFa versus AZFc; c: AZFb versus AZFc. Values in “n”, range, rate or mean±s.d. \*Significant differences (P<0.05); NS: not significant. AZFa, (1): one patient has repeated TESE (1 cycle). AZFc, (8): eight patients repeated TESE (14 cycles). AZFc, Abortion: 5 abortions of singleton pregnancies. COC: cumulus-ooocyte complexes (aspirated oocytes); MII: mature oocytes at metaphase II of meiosis; 2PN: normal fertilized oocytes (with 2 pronuclei and 2 polar bodies); FR: fertilization rate; ECR: embryo cleavage rate; Day 3 grade A/B embryos: high quality embryos at day 3; BL: blastocysts; BLR: blastocyst rate; ETC: embryo transfer cycles; n° ET: total number of transferred embryos; BP: biochemical pregnancy; CP: clinical pregnancy; IR: implantation rate; Ect P: ectopic pregnancy; OP: ongoing pregnancy; LBDR: live birth delivery rate; NB: newborn; NB malform: newborn malformations; Chr abn: newborn chromosome abnormalities; ENdeath: early neonatal death; TESE: testicular sperm extraction; AZF: azoospermia factor; s.d.: standard deviation; Sg: singletons; Tw: twins
