# Supplementary material for: Y-chromosome microdeletions in nonobstructive azoospermia and severe oligozoospermia
Source: PubMed Central journal article supplement — Asian J Androl. 2016 Feb 23;19(3):338–45. doi: 10.4103/1008-682X.172827 (PMC5427791; doi:10.4103/1008-682x.172827), 2016-02-23
Supplement: AJA-19-338_Suppl2.pdf [file AJA-19-338_Suppl2.pdf]

**Supplementary Table 2: Newborn outcomes of patients with Y-chromosome microdeletions**

| TESE                                                 | AZFa                           | AZFb    | AZFc                                | P <sup>a</sup>                |
|------------------------------------------------------|--------------------------------|---------|-------------------------------------|-------------------------------|
| Cycles ( <i>n</i> )                                  | 5                              | 3       | 43                                  | -                             |
| ETC ( <i>n</i> , range)                              | 4 (3–5)                        | 3 (3–3) | 40 (2–5)                            | NS: a=0.408; b=0.319; c=0.636 |
| Newborn ( <i>n</i> , rate)                           | -                              | -       | 12 (30.0)                           | -                             |
| Gestation age ( <i>n</i> , mean, range)              | -                              | -       | 12 (38.2±2.5) (31–40.5)             | -                             |
| Term ( <i>n</i> , mean, rate, range)                 | -                              | -       | 11 (39±0.8) (90.0) (38–40.5)        | -                             |
| Preterm ( <i>n</i> , mean, rate, range)              | -                              | -       | 0                                   | -                             |
| Very preterm ( <i>n</i> , mean, rate, range)         | -                              | -       | 1 (31±0.0) (10.0)                   | -                             |
| Extremely preterm ( <i>n</i> , mean, rate, range)    | -                              | -       | 0                                   | -                             |
| Weight ( <i>n</i> , mean, range)                     | -                              | -       | 12 (3021.3±795.4) (1530–4250)       | -                             |
| Normal weight ( <i>n</i> , mean, rate, range)        | -                              | -       | 9 (3179.3±290.1) (58.3) (2800–3610) | -                             |
| Low weight ( <i>n</i> , mean, rate, range)           | -                              | -       | 3 (1880±274.4) (25.0) (1530–2200)   | -                             |
| Very low weight ( <i>n</i> , mean, rate, range)      | -                              | -       | 0                                   | -                             |
| Extremely low weight ( <i>n</i> , mean, rate, range) | -                              | -       | 0                                   | -                             |
| <b>TESE-C</b>                                        |                                |         |                                     |                               |
| Cycles ( <i>n</i> )                                  | 10                             | 4       | 29                                  | -                             |
| ETC ( <i>n</i> , range)                              | 9 (2–4)                        | 4 (2–3) | 25 (2–5)                            | NS: a=0.512; b=0.757; c=0.428 |
| Newborn ( <i>n</i> , rate, range)                    | 2 (22.2)                       | 0       | 5 (20.0)                            | NS: 0.889                     |
| Gestation age ( <i>n</i> , mean, range)              | 2 (37±0.0) (37–37)             | -       | 5 (36.5±2.7) (32–39)                | NS: 0.895                     |
| Term ( <i>n</i> , mean, rate, range)                 | 2 (37±0.0) (100) (37–37)       | -       | 4 (38±0.8) (75.0) (37–39)           | NS: 1.000                     |
| Preterm ( <i>n</i> , mean, rate, range)              | -                              | -       | 1 (32±0.0) (25.0) (32–32)           | -                             |
| Very preterm ( <i>n</i> , mean, rate, range)         | -                              | -       | 0                                   | -                             |
| Extremely preterm ( <i>n</i> , mean, rate, range)    | -                              | -       | 0                                   | -                             |
| Weight ( <i>n</i> , mean, range)                     | 2 (2750±250) (2500–3000)       | -       | 5 (2653±634.7) (1835–3280)          | NS: 0.866                     |
| Normal weight ( <i>n</i> , mean, rate, range)        | 2 (2750±250) (100) (2500–3000) | -       | 3 (3160±162.7) (60.0) (2930–3280)   | NS: 0.184                     |
| Low weight ( <i>n</i> , mean, rate, range)           | -                              | -       | 2 (1892.5±57.5) (40.0) (1835–1950)  | -                             |
| Very low weight ( <i>n</i> , mean, rate, range)      | -                              | -       | 0                                   | -                             |
| Extremely low weight ( <i>n</i> , mean, rate, range) | -                              | -       | 0                                   | -                             |
| <b>EJAC</b>                                          |                                |         |                                     |                               |
| Cycles ( <i>n</i> )                                  | -                              | 5       | 24                                  | -                             |
| ETC ( <i>n</i> , range)                              | -                              | 3 (2–4) | 24 (2–5)                            | c=0.001                       |
| Newborn ( <i>n</i> , rate)                           | -                              | 0       | 8 (33.3)                            | NS: 0.234                     |
| Gestation age ( <i>n</i> , mean, range)              | -                              | -       | 8 (38.8±1.5) (36.5–40.5)            | -                             |
| Term ( <i>n</i> , mean, rate, range)                 | -                              | -       | 7 (39.2±1.3) (83.3) (37–40.5)       | -                             |
| Preterm ( <i>n</i> , mean, rate, range)              | -                              | -       | 1 (36.5±0.0) (16.7) (36.5–36.5)     | -                             |
| Very preterm ( <i>n</i> , mean, rate, range)         | -                              | -       | 0                                   | -                             |
| Extremely preterm ( <i>n</i> , mean, rate, range)    | -                              | -       | 0                                   | -                             |
| Weight ( <i>n</i> , mean, range)                     | -                              | -       | 8 (2820.1±544.5) (2200–4000)        | -                             |
| Normal weight ( <i>n</i> , mean, rate, range)        | -                              | -       | 5 (3137.2±448.4) (62.5) (2800–4000) | -                             |
| Low weight ( <i>n</i> , mean, rate, range)           | -                              | -       | 3 (2291.7±93.5) (37.5) (2200–2420)  | -                             |
| Very low weight ( <i>n</i> , mean, rate, range)      | -                              | -       | 0                                   | -                             |
| Extremely low weight ( <i>n</i> , mean, rate, range) | -                              | -       | 0                                   | -                             |

TESE: ICSI with fresh testicular sperm. TESE-C: ICSI with cryopreserved testicular sperm. EJAC: ICSI with ejaculated sperm. Comparisons – a: AZFa versus AZFb; b: AZFa versus AZFc; c: AZFb versus AZFc. Values in: *n*, rate, mean±s.d., range. \*Significant differences ( $P<0.05$ ); NS: not significant. Term:  $\geq 37$ – $\leq 42$  (weeks); Preterm:  $< 37$ – $\geq 32$ ; Very preterm:  $< 32$ – $\geq 28$ ; Extremely preterm:  $< 28$ ; Normal weight:  $\geq 2500$ – $\leq 4000$  (g); Low-weight:  $< 2500$ – $\geq 1500$ ; Very low weight:  $< 1500$ – $\geq 1000$ ; Extremely low weight:  $< 1000$ . TESE: testicular sperm extraction; AZF: azoospermia factor; s.d.: standard deviation; ETC: embryo transfer cycles
