# Supplementary material for: Y-chromosome microdeletions in nonobstructive azoospermia and severe oligozoospermia
Source: PubMed Central journal article supplement — Asian J Androl. 2016 Feb 23;19(3):338–45. doi: 10.4103/1008-682X.172827 (PMC5427791; doi:10.4103/1008-682x.172827), 2016-02-23
Supplement: AJA-19-338_Suppl3.pdf [file AJA-19-338_Suppl3.pdf]

**Supplementary Table 1b: Embryological and clinical outcomes of patients with Y-chromosome microdeletions (TESE-C)**

| TESE-C                                      | AZF <sub>a</sub>   | AZF <sub>b</sub>    | AZF <sub>c</sub>     | P <sup>a</sup>                    |
|---------------------------------------------|--------------------|---------------------|----------------------|-----------------------------------|
| Patients (n)                                | 1 + (3)            | (2)                 | 3 + (14)             | 4 + (19)                          |
| Cycles (n)                                  | 10                 | 4                   | 29                   | 43                                |
| COC (n, mean, range)                        | 52 (5.2±1.9) (3–8) | 18 (4.5±2.9) (1–9)  | 245 (8.4±3.2) (2–14) | b, c<br>a=0.653; b=0.042; c=0.038 |
| MII (n, mean, range)                        | 47 (4.7±1.8) (3–8) | 11 (2.75±1.5) (1–5) | 216 (7.4±3.4) (1–14) | c<br>a=0.212; b=0.081; c=0.011    |
| Maturation rate (MII/COC)                   | 90.4               | 61.1                | 88.2                 | a, c<br>a=0.005; b=0.650; c=0.001 |
| 2PN (n, mean, range)                        | 30 (3±1.6) (0–6)   | 6 (1.5±0.5) (1–2)   | 90 (3.1±2.4) (0–11)  | NS: a=0.179; b=0.925; c=0.319     |
| FR (2PN/II)                                 | 63.8               | 54.5                | 41.7                 | b<br>a=0.567; b=0.006; c=0.402    |
| Embryos cleaved (n, mean, range)            | 29 (3.2±1.5) (1–6) | 4 (1±0.0) (1–1)     | 74 (2.85±1.97) (0–9) | NS: a=0.061; b=0.693; c=0.059     |
| ECR (d2/2PN)                                | 96.7               | 66.7                | 82.2                 | a, b<br>a=0.015; b=0.049; c=0.346 |
| Day 3 embryos (n, mean, range)              | 27 (3±1.8) (1–6)   | 2 (0.5±0.5) (0–1)   | 73 (2.9±2.1) (0–9)   | a, c<br>a=0.048; b=0.938; c=0.023 |
| Day 3 grade A/B embryos (n, rate, range)    | 13 (48.1) (0–4)    | 1 (50.0) (0–1)      | 30 (41.1) (0–4)      | NS: a=0.451; b=0.731; c=0.390     |
| Embryos at day 5 (n, mean, range)           | -                  | -                   | 18 (1.29±2.7) (0–9)  | NS: 0.522                         |
| BL (n, range)                               | -                  | -                   | 2 (0–2)              | -                                 |
| BLR (BL/d5)                                 | -                  | -                   | 11.1                 | -                                 |
| ETC (n, range, rate)                        | 9 (2–4) (90.0)     | 4 (2–3) (100)       | 25 (2–5) (86.2)      | NS: a=0.512; b=0.757; c=0.428     |
| n° ET (n, mean, range)                      | 25 (2.8±0.6) (2–4) | 4 (1±0.0) (1–1)     | 51 (2.04±0.8) (1–4)  | a, c<br>a=0.000; b=0.058; c=0.009 |
| BP (/ETC) (n, rate)                         | 1 (11.1)           | -                   | 7 (28.0)             | NS: a=0.488; b=0.305; c=0.224     |
| CP (/ETC) (n, rate)                         | 1 (11.1)           | -                   | 5 (20.0)             | NS: a=0.488; b=0.548; c=0.326     |
| Sacs (n, range)                             | 2 (2–2)            | -                   | 6 (1–2)              | -                                 |
| IR (n° sacs/n° ET)                          | 8.0                | -                   | 11.8                 | NS: 0.612                         |
| Sg (/CP) (n, rate)                          | -                  | -                   | 4 (80.0)             | -                                 |
| Tw (/CP) (n, rate)                          | 1 (100)            | -                   | 1 (20.0)             | -                                 |
| Triplets (/CP) (n, rate)                    | -                  | -                   | 0                    | -                                 |
| Ect P (/CP) (n, rate, range)                | -                  | -                   | 0                    | -                                 |
| Abortion (/CP) (n, rate)                    | -                  | -                   | 1 (20.0)             | -                                 |
| OP (/ETC) (n, rate) (CP-abortion)           | 1 (11.1)           | -                   | 4 (16.0)             | NS: 0.722                         |
| Delivery (/ETC) (n, rate)                   | 1 (11.1)           | -                   | 4 (16.0)             | NS: 0.722                         |
| Stillbirth (/ETC) (n, rate)                 | -                  | -                   | -                    | -                                 |
| LBDR (/ETC) (n, rate) (delivery-stillbirth) | 1 (11.1)           | -                   | 4 (16.0)             | NS: 0.722                         |
| NB (/ETC) (n, rate)                         | 2 (22.2)           | -                   | 5 (20.0)             | NS: 0.889                         |
| NB (Sg; Tw)                                 | 1 (Tw)             | -                   | 3 (Sg); 1 (Tw)       | -                                 |
| Male (/NB) (n, rate)                        | 1 (50.0)           | -                   | 2 (40.0)             | NS: 0.809                         |
| Female (/NB) (n, rate)                      | 1 (50.0)           | -                   | 3 (60.0)             | NS: 0.809                         |
| Male/female ratio                           | 1                  | -                   | 0.7                  | NS: 0.3822                        |
| NB malform (n, rate)                        | -                  | -                   | -                    | -                                 |
| Major (/NB) (n, rate)                       | -                  | -                   | -                    | -                                 |
| Minor (/NB) (n, rate)                       | -                  | -                   | -                    | -                                 |
| NB Chr abn (n, rate, range)                 | -                  | -                   | -                    | -                                 |
| ENdeath (/ETC) (n, rate, range)             | -                  | -                   | -                    | -                                 |

TESE-C: results from ICSI with cryopreserved testicular sperm. Comparisons – a: AZF<sub>a</sub> versus AZF<sub>b</sub>; b: AZF<sub>a</sub> versus AZF<sub>c</sub>; c: AZF<sub>b</sub> versus AZF<sub>c</sub>. Values in “n”, range, rate or mean±s.d.  
<sup>a</sup>Significant differences (P<0.05); NS: not significant. AZF<sub>a</sub>: one patient from TESE-C had 2 cycles with cryopreserved sperm; (3): three patients from TESE had 8 further cycles with cryopreserved sperm; AZF<sub>b</sub>, (2): two patients from TESE had 4 further cycles with cryopreserved sperm; AZF<sub>c</sub>: three patients from TESE-C had 6 cycles with cryopreserved sperm; (14): fourteen patients from TESE had 23 further cycles with cryopreserved sperm; AZF<sub>c</sub>, Abortion: 1 abortion of a singleton pregnancy. COC: cumulus-oocyte complexes (aspirated oocytes); MII: mature oocytes at metaphase II of meiosis; 2PN: normal fertilized oocytes (with 2 pronuclei and 2 polar bodies); FR: fertilization rate; ECR: embryo cleavage rate; Day 3 grade A/B embryos: high quality embryos at day 3; BL: blastocysts; BLR: blastocyst rate; ETC: embryo transfer cycles; n° ET: total number of transferred embryos; BP: biochemical pregnancy; CP: clinical pregnancy; IR: implantation rate; Ect P: ectopic pregnancy; OP: ongoing pregnancy; LBDR: live birth delivery rate; NB: newborn; NB malform: newborn malformations; Chr abn: newborn chromosome abnormalities; ENdeath: early neonatal death; TESE: testicular sperm extraction; AZF: azoospermia factor; s.d.: standard deviation; Sg: singletons; Tw: twins
