# Supplementary material for: Y-chromosome microdeletions in nonobstructive azoospermia and severe oligozoospermia
Source: PubMed Central journal article supplement — Asian J Androl. 2016 Feb 23;19(3):338–45. doi: 10.4103/1008-682X.172827 (PMC5427791; doi:10.4103/1008-682x.172827), 2016-02-23
Supplement: AJA-19-338_Suppl4.pdf [file AJA-19-338_Suppl4.pdf]

**Supplementary Table 1c: Embryological and clinical outcomes of patients with Y-chromosome microdeletions: Ejaculated sperm**

| <i>EJAC</i>                                          | <i>AZF<sub>a</sub></i> | <i>AZF<sub>b</sub></i> | <i>AZF<sub>c</sub></i> | <i>P<sup>a</sup></i> |
|------------------------------------------------------|------------------------|------------------------|------------------------|----------------------|
| Patients ( <i>n</i> )                                | -                      | 2 + (1)                | 16 + (7)               | 18 + (8)             |
| Cycles ( <i>n</i> )                                  | -                      | 5                      | 24                     | 29                   |
| COC ( <i>n</i> , mean, range)                        | -                      | 42 (8.4±2.4) (5–12)    | 194 (8.1±2.9) (2–13)   | NS: 0.832            |
| MII ( <i>n</i> , mean, range)                        | -                      | 27 (5.4±3.3) (1–11)    | 149 (6.2±2.6) (1–11)   | NS: 0.565            |
| Maturation rate (MII/COC)                            | -                      | 64.3                   | 76.8                   | NS: 0.092            |
| 2PN ( <i>n</i> , mean, range)                        | -                      | 16 (3.2±3.4) (0–9)     | 110 (4.6±2.1) (1–10)   | NS: 0.270            |
| FR (2PN/MII)                                         | -                      | 59.3                   | 73.8                   | NS: 0.124            |
| Embryos cleaved ( <i>n</i> , mean, range)            | -                      | 15 (5±2.4) (2–8)       | 105 (4.4±2.2) (1–10)   | NS: 0.667            |
| ECR (d2/2PN)                                         | -                      | 93.8                   | 95.5                   | NS: 0.764            |
| Day 3 embryos ( <i>n</i> , mean, range)              | -                      | 13 (4.3±3.3) (5–8)     | 104 (4.3±2.3) (0–10)   | NS: 1.000            |
| Day 3 grade A/B embryos ( <i>n</i> , rate, range)    | -                      | 11 (84.6) (4–7)        | 74 (71.2) (1–9)        | NS: 0.136            |
| Embryos at day 5 ( <i>n</i> , mean, range)           | -                      | -                      | 50 (6.3±1.9) (4–10)    | NS: 0.362            |
| BL ( <i>n</i> , range)                               | -                      | -                      | 21 (1–6)               | -                    |
| BLR (BL/d5)                                          | -                      | -                      | 42.0                   | -                    |
| ETC ( <i>n</i> , range, rate)                        | -                      | 3 (2–4) (60.0)         | 24 (2–5) (100)         | c=0.001              |
| n° ET ( <i>n</i> , mean, range)                      | -                      | 8 (2.7±0.5) (2–3)      | 46 (1.9±0.6) (1–4)     | NS: 0.070            |
| BP (/ETC) ( <i>n</i> , rate)                         | -                      | 1 (33.3)               | 8 (33.3)               | NS: 1.000            |
| CP (/ETC) ( <i>n</i> , rate)                         | -                      | 1 (33.3)               | 8 (33.3)               | NS: 1.000            |
| Sacs ( <i>n</i> , range)                             | -                      | 3 (3–3)                | 11 (1–2)               | -                    |
| IR (n° sacs/n° ET)                                   | -                      | 37.5                   | 23.9                   | NS: 0.418            |
| Sg (/CP) ( <i>n</i> , rate)                          | -                      | -                      | 4 (50.0)               | -                    |
| Tw (/CP) ( <i>n</i> , rate)                          | -                      | -                      | 4 (50.0)               | -                    |
| Triplets (/CP) ( <i>n</i> , rate)                    | -                      | 1 (100)                | -                      | -                    |
| Ect P (/CP) ( <i>n</i> , rate, range)                | -                      | -                      | -                      | -                    |
| Abortion (/CP) ( <i>n</i> , rate)                    | -                      | 1 (33.3)               | 2 (25.0)               | -                    |
| OP (/ETC) ( <i>n</i> , rate) (CP-Abortion)           | -                      | -                      | 6 (25.0)               | NS: 0.757            |
| Delivery (/ETC) ( <i>n</i> , rate)                   | -                      | -                      | 6 (25.0)               | NS: 0.326            |
| Stillbirth (/ETC) ( <i>n</i> , rate)                 | -                      | -                      | 1                      | -                    |
| LBDR (/ETC) ( <i>n</i> , rate) (delivery-stillbirth) | -                      | -                      | 6 (25.0)               | NS: 0.326            |
| NB (/ETC) ( <i>n</i> , rate)                         | -                      | -                      | 8 (33.3)               | NS: 0.234            |
| NB (Sg; Tw)                                          | -                      | -                      | 3 (Sg); 3 (Tw)         | -                    |
| Male (/NB) ( <i>n</i> , rate)                        | -                      | -                      | 5 (62.5)               | -                    |
| Female (/NB) ( <i>n</i> , rate)                      | -                      | -                      | 3 (37.5)               | -                    |
| M/F ratio                                            | -                      | -                      | 1.67                   | -                    |
| NB malform ( <i>n</i> , rate)                        | -                      | -                      | -                      | -                    |
| Major (/NB) ( <i>n</i> , rate)                       | -                      | -                      | -                      | -                    |
| Minor (/NB) ( <i>n</i> , rate)                       | -                      | -                      | -                      | -                    |
| NB Chr abn ( <i>n</i> , rate, range)                 | -                      | -                      | -                      | -                    |
| ENdeath (/ETC) ( <i>n</i> , rate, range)             | -                      | -                      | -                      | -                    |

EJAC: results from ICSI with ejaculated sperm. Comparisons – a: AZF<sub>a</sub> versus AZF<sub>b</sub>; b: AZF<sub>a</sub> versus AZF<sub>c</sub>; c: AZF<sub>b</sub> versus AZF<sub>c</sub>. Values in “*n*”, range, rate or mean±s.d. \*Significant differences (*P*<0.05); NS: not significant. AZF<sub>b</sub>: two patients had four cycles with ejaculated sperm; (1): one patient from TESE 1 cycle with ejaculated sperm; AZF<sub>c</sub>, (7): seven patients from ejaculated sperm had 8 further cycles with ejaculated sperm; AZF<sub>c</sub>: abortion of 1 singleton and 1 twin pregnancies; AZF<sub>c</sub>: one twin pregnancy lost 1 fetus. COC: cumulus-oocyte complexes (aspirated oocytes); MII: mature oocytes at metaphase II of meiosis; 2PN: normal fertilized oocytes (with 2 pronuclei and 2 polar bodies); FR: fertilization rate; ECR: embryo cleavage rate; Day 3 grade A/B embryos: high quality embryos at day 3; BL: blastocysts; BLR: blastocyst rate; ETC: embryo transfer cycles; n° ET: total number of transferred embryos; BP: biochemical pregnancy; CP: clinical pregnancy; IR: implantation rate; Ect P: ectopic pregnancy; OP: ongoing pregnancy; LBDR: live birth delivery rate; NB: newborn; NB malform: newborn malformations; Chr abn: newborn chromosome abnormalities; ENdeath: early neonatal death; AZF: azoospermia factor; s.d.: standard deviation; Sg: singletons; Tw: twins; TESE: testicular sperm extraction
